# Supplementary material for: A Genomic Survey of Positive Selection in Burkholderia pseudomallei Provides Insights into the Evolution of Accidental Virulence
Source: PLOS journal article supplement (doi:10.1371/journal.ppat.1000845), 2010-04-01
Supplement: S9 (10.1371/journal.ppat.1000845.s009) [file journal.ppat.1000845.s009]

Table S1: List of *B. pseudomallei* Strains

| S.No | Strain        | Sequenced by | Original Source | Clinical Data                                                                                                                                                                                                                                               | MLST   |
|------|---------------|--------------|-----------------|-------------------------------------------------------------------------------------------------------------------------------------------------------------------------------------------------------------------------------------------------------------|--------|
| 1    | K96243        | Sanger       | Thailand        | Isolated in 1996 from a 34 year old female diabetic patient at Khon Kaen hospital, northeast with a clinical history of short incubation, septicemic infection, and rapid progression to death.                                                             | ST 10  |
| 2    | 1655          | JCVI         | Australia       | From Menzies School of Health Research, Australia. 2003 sputum isolate from a 64 year old female patient from Darwin treated at Royal Darwin Hospital for chronic pulmonary melioidosis on a background of severe bronchiectasis                            | ST 131 |
| 3    | Pasteur 52237 | JCVI         | Vietnam         | Obtained from Finkelstein collection. Am. J. Trop. Med. Hyg. 62:232-239, 2000.                                                                                                                                                                              | ST 411 |
| 4    | 406e          | JCVI         | Bangkok         | Isolated from toe swab in 1988 from a 21-year old male labourer presenting to Sappasithiprasong hospital. Disseminated disease (bacteremia, lung, skin, renal tract involvement). Died on second day of admission.                                          | ST 211 |
| 5    | S13           | JCVI         | Singapore       | Mucoid environmental strain.                                                                                                                                                                                                                                | ST 51  |
| 6    | 22            | GIS          | Singapore       | Isolated from National Service man in 1989.                                                                                                                                                                                                                 | ST423  |
| 7    | 668           | JCVI         | Australia       | 1995 blood culture isolate from a 53 year old male patient with severe melioidosis encephalomyelitis. Required prolonged ventilation at Royal Darwin Hospital ICU but survived with good cognitive function but residual hemiparesis.                       | ST 129 |
| 8    | 1106a         | JCVI         | Bangkok         | Isolated from pus aspirated from liver abscess in 1993 from a 23-year old female rice farmer presenting to Sappasithiprasong hospital. Risk factors: thalassaemia and splenectomy. Multiple hepatic abscesses. Survived to discharge.                       | ST 70  |
| 9    | 1106b         | JCVI         | Bangkok         | Isolated from pus aspirated from liver abscess in 1996 from patient described above. Survived to discharge.                                                                                                                                                 | ST 70  |
| 10   | 1710a         | JCVI         | Bangkok         | Isolated from blood culture in 1996 from a 52-year old male rice farmer with a new diagnosis of diabetes mellitus presenting to Sappasithiprasong hospital. Disseminated disease (bacteremia plus lung and soft tissue involvement). Survived to discharge. | ST 177 |
| 11   | 1710b         | JCVI         | Bangkok         | Isolated from blood culture in March 1999 from patient described above. Died on day of admission.                                                                                                                                                           | ST 177 |
