# Supplementary material for: A Genomic Survey of Positive Selection in Burkholderia pseudomallei Provides Insights into the Evolution of Accidental Virulence
Source: PLOS journal article supplement (doi:10.1371/journal.ppat.1000845), 2010-04-01
Supplement: S13 (10.1371/journal.ppat.1000845.s013) [file journal.ppat.1000845.s013]

Table S5: Recurrent SNPs and SNPs identified in five high-quality Bp genomes

|         | Total no of SNPs across 11 genomes | Evidence 1                 |                |       | Evidence 2                                                             | Total Number of SNPs supported by either Evidence 1 or 2 |
|---------|------------------------------------|----------------------------|----------------|-------|------------------------------------------------------------------------|----------------------------------------------------------|
|         |                                    | Recurrent SNP's            |                |       | SNPs present across five high sequence quality Bp genomes <sup>†</sup> |                                                          |
|         |                                    | 11 Bp genomes <sup>‡</sup> | 23 Bp genomes* | Total |                                                                        |                                                          |
| Bp Chr1 | 15236                              | 8002                       | 2928           | 9637  | 11335                                                                  | 12750 (~84%)                                             |
| Bp Chr2 | 11080                              | 5624                       | 1363           | 6359  | 8307                                                                   | 9029 (~82%)                                              |
