# Supplementary material for: A Genomic Survey of Positive Selection in Burkholderia pseudomallei Provides Insights into the Evolution of Accidental Virulence
Source: PLOS journal article supplement (doi:10.1371/journal.ppat.1000845), 2010-04-01
Supplement: S20 (10.1371/journal.ppat.1000845.s020) [file journal.ppat.1000845.s020]

### **Text S1: Motifs at inversions**

We identified three large-scale inversions involving genomic regions of about 1.6Mb, 1.2Mb and 880Kb on Chromosome 1 (Figure 1 in Main Text). Bp strain 406e contained the largest inversion (~1.6Mb) which was flanked by a NnR5 protein coding gene at the 5' region and 5S\_rRNAs, LSU\_rRNA, tRNAs at the 3' region. The ~1.2Mb inversion in both 1655 (Australian variant) and Pasteur 52237 (Vietnam variant) was flanked by tRNAs, repeats, a transcriptional regulator, and a universal stress protein at the 5' flanking region and a 5S\_rRNA and tRNA gene at the 3' region. The reference genome K96243 also has a unique inversion of ~880kb, flanked by an inverted cluster of four protein coding genes forming PAAR motifs.
